# Supplementary material for: An Evaluation of Glycerol Acetalization with Benzaldehyde over a Ferromagnetic Heteropolyacid Catalyst
Source: MDPI journal article supplement (doi:10.3390/catal13040782), 2023-04-21
Supplement: s1 [file s1]

Archive with 1 entries (1 files):
- catalysts-2320962-supplementary.pdf
