# Supplementary material for: An Evaluation of Glycerol Acetalization with Benzaldehyde over a Ferromagnetic Heteropolyacid Catalyst
Source: MDPI journal article supplement (doi:10.3390/catal13040782), 2023-04-21
Supplement: s1 [file s1 › catalysts-2320962-supplementary.pdf]

# An Evaluation of Glycerol Acetalization with Benzaldehyde over a Ferromagnetic Heteropolyacid Catalyst

Rami Doukeh<sup>1</sup>, Maria Răpă<sup>2</sup>, Ecaterina Matei<sup>2</sup>, Doina Prodan<sup>3</sup>, Romuald György<sup>4</sup>, Ancuta Trifoi<sup>2\*</sup>, Ionut Banu<sup>4\*</sup>

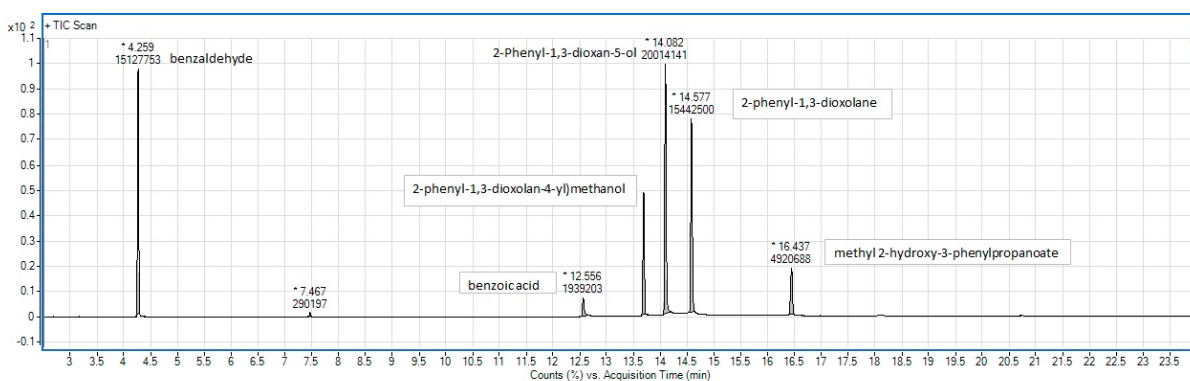

**Figure S1.** The GC-MS spectrum of a typical reaction mixture.

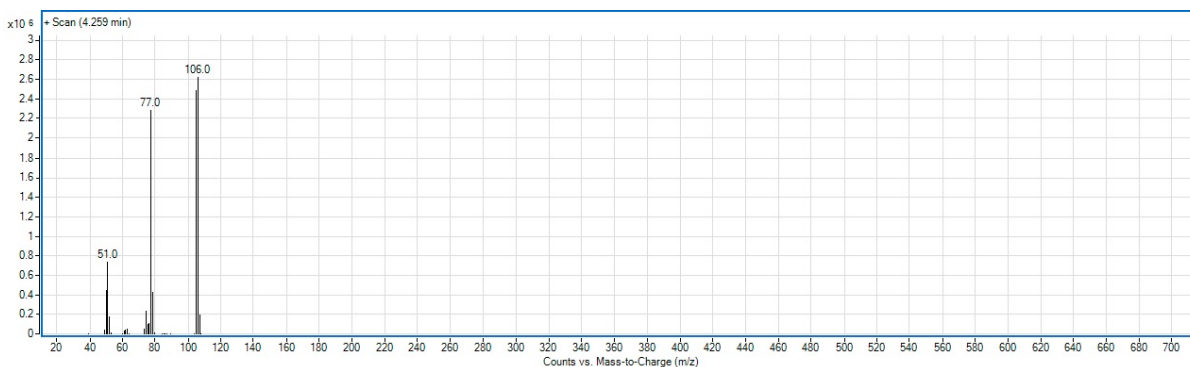

**Figure S2.** The GC-MS signals of benzaldehyde.

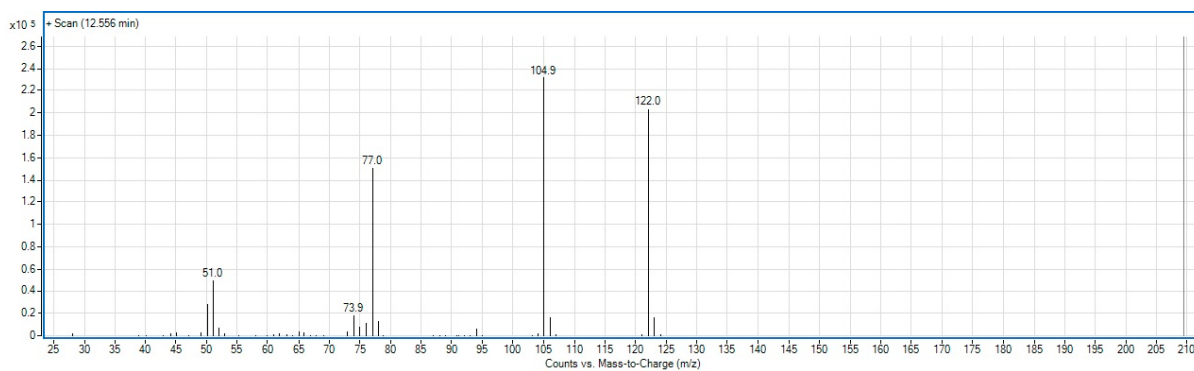

**Figure S3.** The GC-MS signals of benzoic acid.

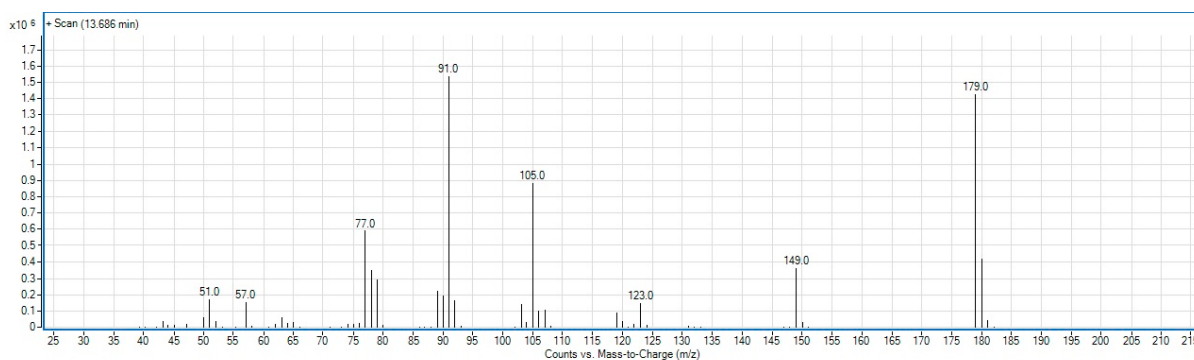

**Figure S4.** The GC-MS signals of 2-phenyl-1,3-dioxolan-4-yl) methanol.

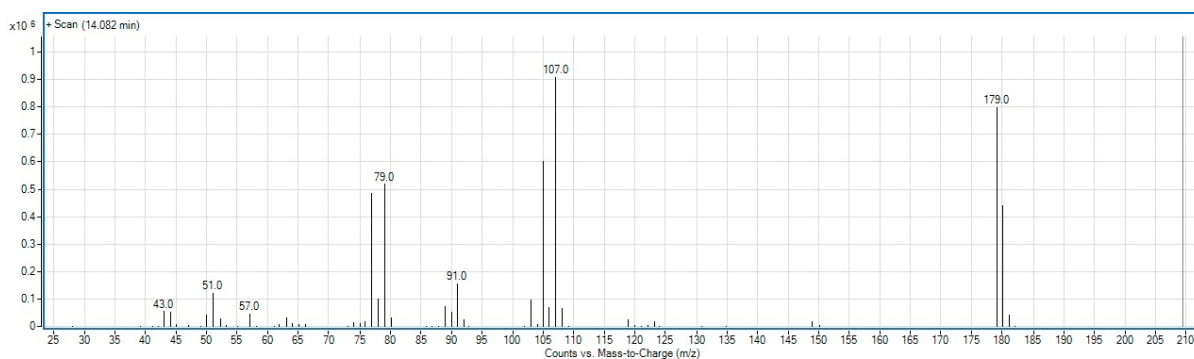

**Figure S5.** The GC-MS signals of 2-Phenyl-1,3-dioxan-5-ol.

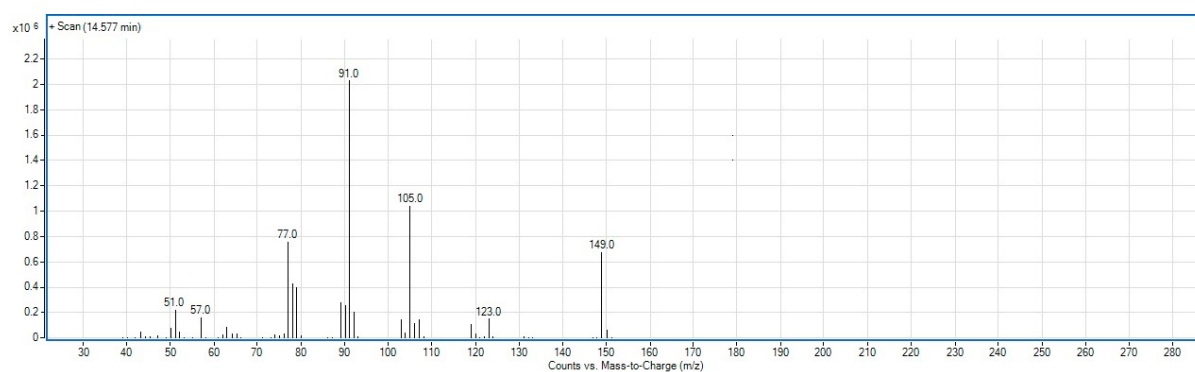

**Figure S6.** The GC-MS signals of 2-phenyl-1,3-dioxolane.

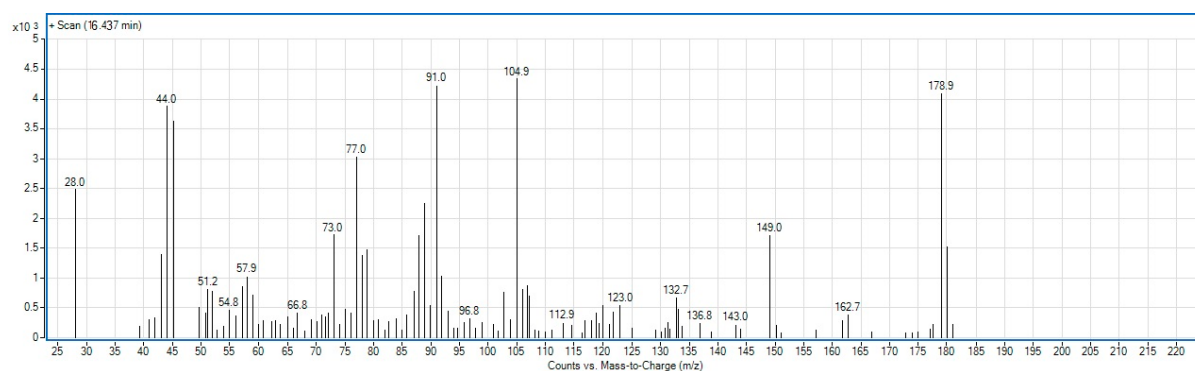

**Figure S7.** The GC-MS signals of methyl 2-hydroxy-3-phenylpropanoate.
